# Supplementary material
Source: PubMed Central journal article supplement (PMC3052634)
Supplement: NIHMS251192-supplement-Supp_Fig_s1-s4___Table_s1.pdf [file NIHMS251192-supplement-Supp_Fig_s1-s4___Table_s1.pdf]

## Supplementary Online Material

**Figure S1. ICP-DRC-MS shows no significant changes in the levels of zinc, copper or manganese in proteasome degradation-defective *Mtb*.** ICP-DRC-MS results for (A) zinc, (B) copper, and (C) manganese. 10 ml of *Mtb* cultures were grown in 7H9 to early stationary phase, lysed in nitric acid, neutralized and brought up to 3 ml in metal free water. After ICP-DRC-MS analysis, we calculated the number of atoms per CFU. Data are representative of three replicates.

**Figure S2. *socAB* is expressed in *Mtb*.** WT *Mtb* RNA was used as a template for cDNA synthesis using random hexamers to prime the reaction following the same protocol used for cDNA preparation for qRT-PCR. cDNA was used as a template for PCR. Lanes correspond to samples treated with RT (+), without RT (-) or samples using genomic DNA as a positive control for the PCR (G). Shaded bars correspond to the amplified fragments.

**Figure S3. *ctpV* does not respond to copper in the  $\Delta csoR::hyg$  mutant.** *ctpV* RNA levels in WT *Mtb* and the  $\Delta csoR::hyg$  mutant with and without copper were measured using qRT-PCR. This is representative of two biological replicates, done in triplicate.

**Figure S4. *Mtb* copper sensitivity is dose dependent.** We performed a copper sensitivity assay as described in Fig. 6 and in the *Experimental Procedures*. The OD<sub>580</sub>

was measured after 10 days of exposure to varying levels of  $\text{CuSO}_4$  added to Sauton's minimal media.

Festa et al., 2010

Supplemental Figure 1

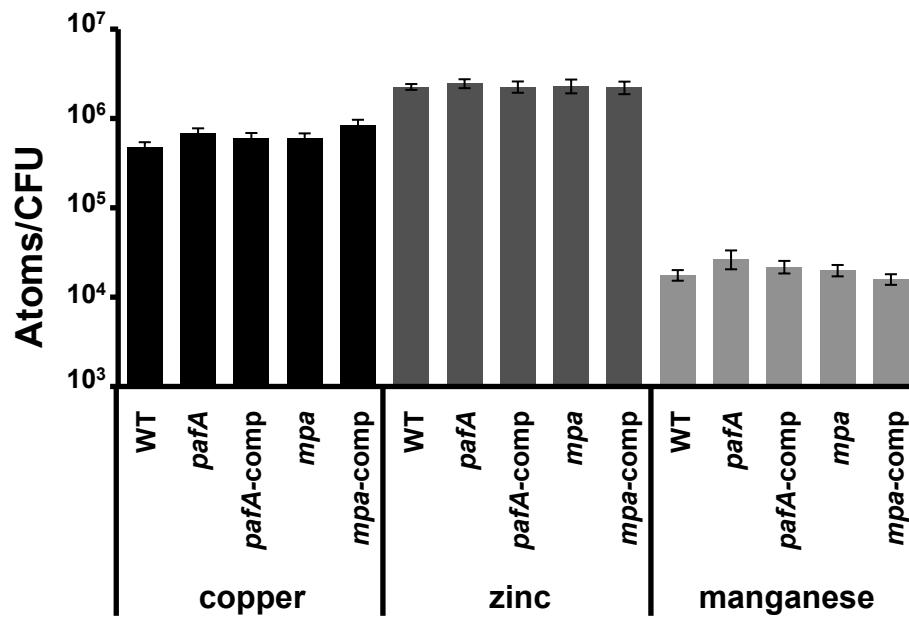

Festa et al., 2010

Supplemental Figure 2

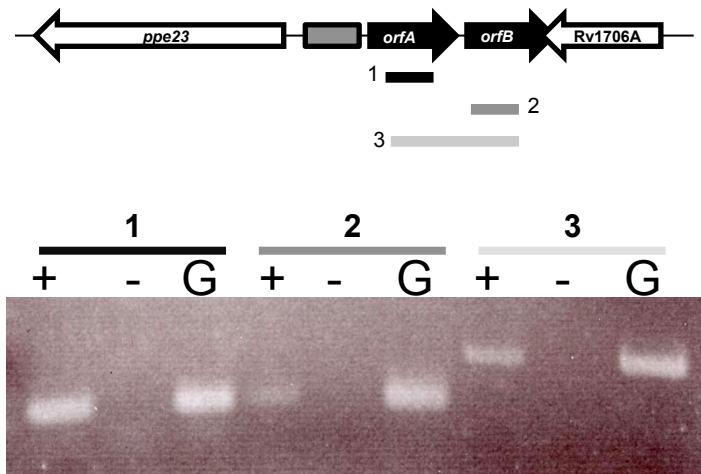

Supplemental Figure 3

A.

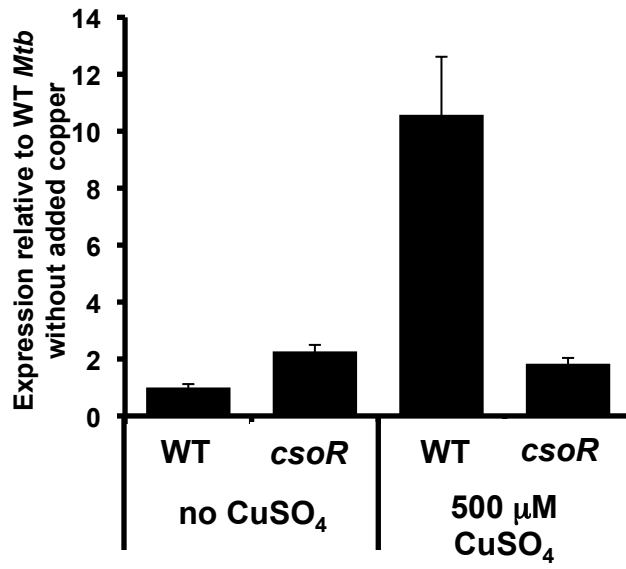

B.

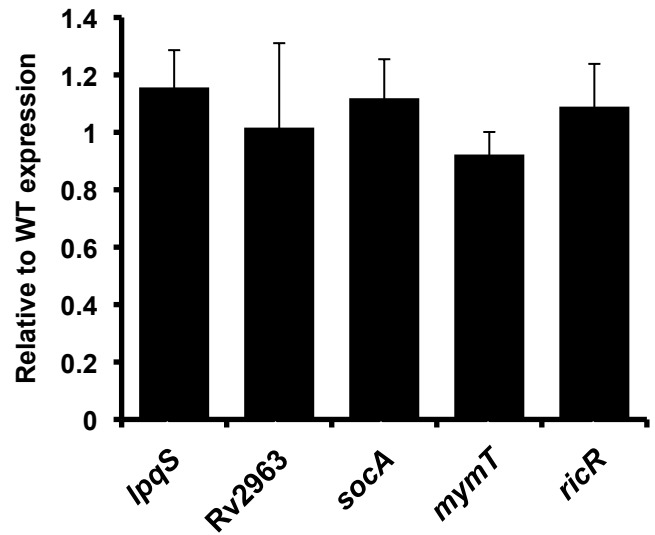

Festa et al., 2010

Supplemental Figure 4

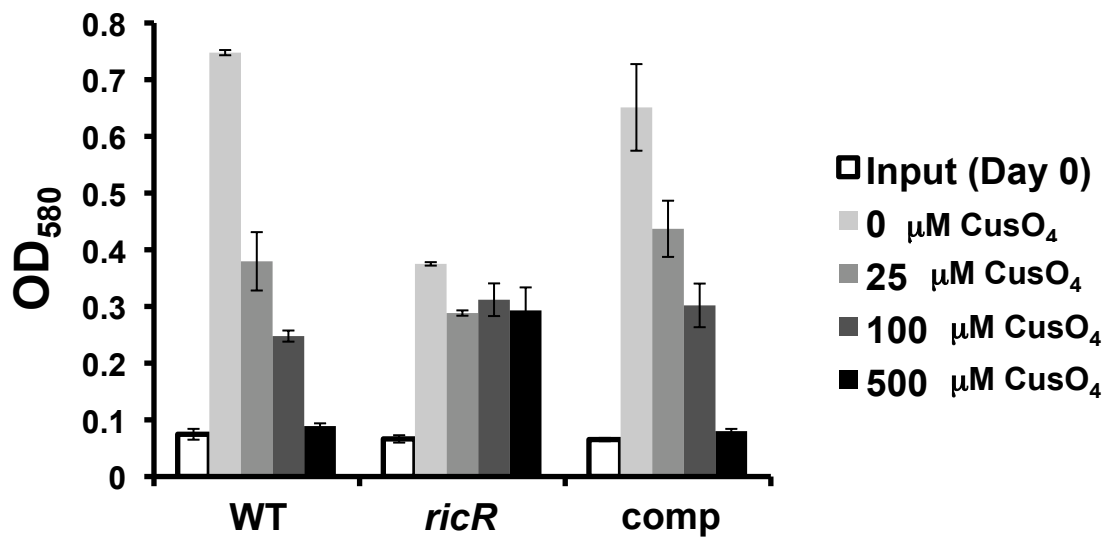

Table S1. Strains, Plasmids and Primers

| Strain, plasmid, or primer             | Genotype or sequence                                                              | Source or Reference                    |
|----------------------------------------|-----------------------------------------------------------------------------------|----------------------------------------|
| <b><i>M. tuberculosis</i> strains:</b> |                                                                                   |                                        |
| <b>H37Rv:</b>                          |                                                                                   |                                        |
| H37Rv                                  | WT                                                                                | American Type Culture Collection 25618 |
| MHD2                                   | Kan <sup>R</sup> ; <i>pafA</i> ::ΦMycoMarT7                                       | (Darwin et al., 2003)                  |
| MHD4                                   | Kan <sup>R</sup> ; <i>mpa607</i> ::ΦMycoMarT7                                     | (Darwin et al., 2003)                  |
| MHD5                                   | Kan <sup>R</sup> ; <i>mpa</i> ::ΦMycoMarT7                                        | (Darwin et al., 2003)                  |
| MHD18                                  | Hyg <sup>R</sup> ; WT, pMV306, Strain:H37Rv                                       | (Darwin et al., 2003)                  |
| MHD22                                  | Kan <sup>R</sup> , Hyg <sup>R</sup> ; <i>mpa</i> ::ΦMycoMarT7, pMV306             | (Darwin et al., 2003)                  |
| MHD23                                  | Kan <sup>R</sup> , Hyg <sup>R</sup> ; <i>mpa</i> ::ΦMycoMarT7, pMV306- <i>mpa</i> | (Darwin et al., 2003)                  |
| MHD62                                  | Kan <sup>R</sup> , Hyg <sup>R</sup> ; <i>pafA</i> ::ΦMycoMarT7, pMV306            | (Festa et al., 2007)                   |
| MHD63                                  | Kan <sup>R</sup> , Hyg <sup>R</sup> ; <i>pafA</i> ::ΦMycoMarT7, pMV306            | (Festa et al., 2007)                   |
| MHD572                                 | Hyg <sup>R</sup> ; Δ <i>csaR</i> :: <i>hyg</i>                                    | This work                              |

**CDC1551:**

|             |                                                                                  |                                          |
|-------------|----------------------------------------------------------------------------------|------------------------------------------|
| CDC1551     | WT                                                                               | W. Bishai collection                     |
| JHU0847-269 | Kan <sup>R</sup> ; <i>ricR</i> ::ΦMycoMarT7                                      | TARGET, Johns Hopkins School of Medicine |
| MHD588      | Hyg <sup>R</sup> ; WT, pMV306                                                    | This work                                |
| MHD589      | Kan <sup>R</sup> , Hyg <sup>R</sup> ; <i>ricR</i> ::ΦMycoMarT7, pMV306           | This work                                |
| MHD590      | Kan <sup>R</sup> , Hyg <sup>R</sup> ; <i>ricR</i> ::ΦMycoMarT7, pMV- <i>ricR</i> | This work                                |

***E. coli* strains:**

|        |                                                                                                                                                                                     |                              |
|--------|-------------------------------------------------------------------------------------------------------------------------------------------------------------------------------------|------------------------------|
| DH5α   | F <sup>-</sup> , p80d <i>lacZ</i> ΔM15 Δ( <i>lacZYA-argF</i> )U169 <i>deoR recA1 endA1 hsdR17</i> (r <sub>k</sub> -m <sub>k</sub> +) <i>phoA supE44 λ- thi-1 gyrA96 relA1</i>       | Gibco, BRL                   |
| ER2566 | F- λ- <i>fhuA2</i> [lon] <i>ompT lacZ::T7 gene1 gal sulA11</i><br>Δ( <i>mcrC-mrr</i> )114::IS10 R( <i>mcr-73</i> ::miniTn10)2<br>R( <i>zgb-210</i> ::Tn10)(Tets) <i>endA1</i> [dcm] | (Chong <i>et al.</i> , 1994) |

**Plasmids:**

|                        |                                                                                         |           |
|------------------------|-----------------------------------------------------------------------------------------|-----------|
| pET24b(+)              | Kan <sup>r</sup> ; for production of C-terminal His <sub>6</sub> epitope-tagged protein | Novagen   |
| pET24b(+)- <i>ricR</i> | Kan <sup>r</sup> ; for expression of <i>ricR</i> -his <sub>6</sub>                      | This work |



|                              |                                                                                                     |                                 |
|------------------------------|-----------------------------------------------------------------------------------------------------|---------------------------------|
| pET24b(+)- <i>ricR</i> -stop | Kan <sup>r</sup> ; for expression of un-tagged <i>ricR</i>                                          | This work                       |
| pET24b(+)- <i>csoR</i>       | Kan <sup>r</sup> ; for expression of <i>csoR</i> -his <sub>6</sub>                                  | This work                       |
| pMV306                       | Hyg <sup>r</sup> ; integrates in single copy on the chromosome                                      | (Stover et al., 1991)           |
| pMV306- <i>pafA</i>          | Hyg <sup>r</sup> ; for complementation of the <i>pafA</i> mutant                                    | (Festa et al., 2007)            |
| pMV306- <i>mpa</i>           | Hyg <sup>r</sup> ; for complementation of the <i>mpa</i> mutant                                     | (Darwin et al., 2003)           |
| pMV306- <i>ricR</i>          | Hyg <sup>r</sup> ; for complementation of the <i>ricR</i> mutant                                    | This work                       |
| pYUB- <i>csoR</i>            | Hyg <sup>r</sup> ; 700 bp flanks of <i>csoR</i> cloned on either end of a hyg <sup>r</sup> cassette | This work                       |
| pAJD107                      | Amp <sup>r</sup> ; large multiple cloning site                                                      | (Darwin & Miller, 2001)         |
| pAJD- <i>lpqSp</i> -GG-TT    | Amp <sup>r</sup> ; plasmid with the <i>lpqS</i> promoter cloned, GG to TT mutation                  | This work                       |
| pAJD- <i>lpqSp</i> -Destroy  | Amp <sup>r</sup> ; plasmid with the <i>lpqS</i> promoter cloned, palindrome is destroyed            | This work                       |
| pYUB854                      | Hyg <sup>r</sup> ; allelic exchange vector                                                          | (Bardarov <i>et al.</i> , 2002) |

**Primers:**

|                   |                         |
|-------------------|-------------------------|
| Rv2963 RACE1      | GTTGGCGGTCCAATAATGAT    |
| Rv2963 RACE2      | GACCTGGGAAATCCTGTGG     |
| <i>lpqS</i> PE    | TTTGGGTGAGCCACATGAC     |
| <i>mymT</i> RACE1 | CTACTTGACCGGGGCAATTCCG  |
| <i>mymT</i> RACE2 | CCAATTCGTCGCCGCAGGTGCAG |

|                   |                       |
|-------------------|-----------------------|
| <i>socA</i> RACE1 | TTGAGAATTGCGTCACATCC  |
| <i>socB</i> RACE2 | CCATGGAGGGCAAATGTC    |
| Rv0190 RACE1      | AGTGGCTCAGGTGCTCGT    |
| Rv0190 RACE2      | GCGCTGATCTGGGTCAGAA   |
| Rv2963 qRTF       | TTTGGCTCGGTCACTATTCC  |
| Rv2963 qRTR       | ATCATTATTGGACCGCCAAC  |
| <i>lpqS</i> qRTF  | CTCCCCCAGCTCCACCGTCA  |
| <i>lpqS</i> qRTR  | GGTCGGTAAGCGCGGCTGTC  |
| <i>mymT</i> qRTF  | AGGGTGATACGAATGACGAAC |
| <i>mymT</i> qRTR  | TCACGTCTACTTGACCGGG   |
| <i>mysT</i> qRTF  | CGACCCCGACGAAGTAAGAG  |
| <i>mysT</i> qRTR  | GTAGTGCCCAGGCATTGAGA  |
| <i>mysU</i> qRTF  | CTGAAAGCCCGGAAGGA     |
| <i>mysU</i> qRTR  | TCACGTAACGCCCTGAGC    |
| Rv0190 qRTF       | CTACACGCAGCAAAAGGACA  |
| Rv0190 qRTR       | GTGCTCGTCCAGCAGGTT    |
| <i>rpoB</i> qRTF  | TCGTTCTCTGACCCTCGTTTC |
| <i>rpoB</i> qRTR  | ACGTGCCCTTCTCGGTCATCA |
| <i>csoR</i> qRTF  | AAGGAATTGACCGCAAAGAA  |

|                            |                                           |
|----------------------------|-------------------------------------------|
| <i>csoR</i> qRTR           | CACGTCTCCAAGTGGTTGTG                      |
| <i>ctpV</i> qRTF           | CGCGTGTGCGTCACCGGG                        |
| <i>ctpV</i> qRTR           | CCGACAGCACGGCGGCGG                        |
| <i>dlaT</i> qRTF           | ACAACGAGGACACCAAGGAG                      |
| <i>dlaT</i> qRTR           | TACCGATGTTGGTGATGGG                       |
| Rv0190 comp F-HindIII      | GACAAGCTTCATTGTTCAAGTATGCGGCCCAAG         |
| Rv0190 comp R-KpnI         | GACGGTACCTCAGGAACGAACCAGGCGCGCG           |
| <i>lpqS</i> affinity F-BIO | [BIO-TEG]ATCGCTCCTCGTCTGGATTT             |
| <i>lpqS</i> affinity R     | AGCGCGACCGCGACAATC                        |
| <i>pks12</i> DAC F BIO     | [BIO-TEG]GAGCAAGGGTAAGTGGGACA             |
| <i>pks12</i> DAC R         | TCTTGCCCATCTCCAAGAAC                      |
| <i>csoR</i> DAC F BIO      | [BIO-TEG]CTCATCGTCCACGAGCCTAC             |
| <i>csoR</i> DAC R          | AATTCCTTGCTCATGGCTTG                      |
| Rv0190 rev stop EcoRI      | GACGAATTCTCAGGAACGAACCAGGCGCGCGATTG       |
| RV0190 F NdeI              | GACCATATGACAGCAGCACACGGCTACAC             |
| Rv0190 rev XhoI            | GACCTCGAGGGAACGAACCAGGCGCGCGATTG          |
| gg1213ttF                  | CACCCTACCCCTATAGTTTATATAGTGGGCCACGTGGAAG  |
| gg1213ttR                  | CTATATAAACTATAGGGGTAGGGTGTAAGGGCGGATGATGG |
| pal destroy F              | CACCCCGAGATGATTACGGATATAGTGGGCCACGTGGAAG  |

|                         |                                                |
|-------------------------|------------------------------------------------|
| pal destroy R           | CTATATCCGTAATCATCTCGGGGTGTAAGGGCGGATGATGG      |
| lpqSIFUPPstI            | GACCTGCAGTGGCTCAGTCGGATCGTCGACGAC              |
| <i>lpqS</i> -his6R PstI | GACCTGCAGTCAGTGGTGGTGGTGGTGGCGACGAGCCAGGCAGAAC |
| cs0R KO1 kpnI           | GATGGTACCCTTGCTATTTGCGGCTATTTG                 |
| cs0R KO2 xbaI           | GATTCTAGACATGGCTTGCCCCTAATCCCTC                |
| cs0R KO3 ncoI           | GATCCATGGTGACGAGCGCCGGACTCCG                   |
| cs0R KO4 hindIII        | GATAAGCTTGCAACGCGACGCCTTCAG                    |

## References

- Bardarov, S., S. Bardarov Jr, Jr., M. S. Pavelka Jr, Jr., V. Sambandamurthy, M. Larsen, J. Tufariello, J. Chan, G. Hatfull & W. R. Jacobs Jr, Jr., (2002) Specialized transduction: an efficient method for generating marked and unmarked targeted gene disruptions in *Mycobacterium tuberculosis*, *M. bovis* BCG and *M. smegmatis*. *Microbiology* **148**: 3007-3017.
- Chong, Y. H., J. M. Jung, W. Choi, C. W. Park, K. S. Choi & Y. H. Suh, (1994) Bacterial expression, purification of full length and carboxyl terminal fragment of Alzheimer amyloid precursor protein and their proteolytic processing by thrombin. *Life Sci* **54**: 1259-1268.
- Darwin, A. J. & V. L. Miller, (2001) The *psp* locus of *Yersinia enterocolitica* is required for virulence and for growth in vitro when the Ysc type III secretion system is produced. *Mol Microbiol* **39**: 429-444.
- Darwin, K. H., S. Ehrh, J. C. Gutierrez-Ramos, N. Weich & C. F. Nathan, (2003) The proteasome of *Mycobacterium tuberculosis* is required for resistance to nitric oxide. *Science* **302**: 1963-1966.
- Festa, R. A., M. J. Pearce & K. H. Darwin, (2007) Characterization of the proteasome accessory factor (*paf*) operon in *Mycobacterium tuberculosis*. *J Bacteriol* **189**: 3044-3050.
- Stover, C. K., V. F. de la Cruz, T. R. Fuerst, J. E. Burlein, L. A. Benson, L. T. Bennett, G. P. Bansal, J. F. Young, M. H. Lee, G. F. Hatfull & et al., (1991) New use of BCG for recombinant vaccines. *Nature* **351**: 456-460.
